# Supplementary material for: Cell-type specific expression of oncogenic and tumor suppressive microRNAs in the human prostate and prostate cancer
Source: PubMed Central journal article supplement (PMC5940660; doi:10.1038/s41598-018-25320-z), 2018-05-08
Supplement: 41598_2018_25320_MOESM1_ESM.pdf [file 41598_2018_25320_MOESM1_ESM.pdf]

**Supplementary Information**

**Cell-type specific expression of oncogenic and tumor suppressive microRNAs in the human  
prostate and prostate cancer**

Binod Kumar, Avi Z. Rosenberg, Su Mi Choi, Karen Fox-Talbot, Angelo M. De Marzo, Larisa  
Nonn, W. Nathaniel Brennen, Luigi Marchionni, Marc K. Halushka, Shawn E. Lupold

**Supplementary Table S1-S2**

**Supplementary Figure S1-S3**

**Supplementary Table S1.** Characteristics of University of Washington and Johns Hopkins radical prostatectomy specimens applied to Figure 1

A) University of Washington Primary Prostate Cancer Samples (Figure 1A)

| <b>Sample ID</b> | <b>Tissue Type</b>      | <b>Primary Gleason</b> | <b>Secondary Gleason</b> | <b>Tertiary Gleason</b> | <b>Total Gleason</b> |
|------------------|-------------------------|------------------------|--------------------------|-------------------------|----------------------|
| 00-074B          | primary prostate cancer | 3                      | 4                        | 0                       | 7                    |
| 02-022B          | primary prostate cancer | 3                      | 4                        | 0                       | 7                    |
| 04-051A          | primary prostate cancer | 3                      | 4                        | 0                       | 7                    |
| 04-055B          | primary prostate cancer | 3                      | 4                        | 0                       | 7                    |
| 04-106D          | primary prostate cancer | 3                      | 3                        | 0                       | 6                    |
| 05-056C          | primary prostate cancer | 3                      | 4                        | 0                       | 7                    |
| 05-120A          | primary prostate cancer | 3                      | 4                        | 0                       | 7                    |
| 05-131B          | primary prostate cancer | 3                      | 4                        | 0                       | 7                    |
| 05-186B          | primary prostate cancer | 3                      | 4                        | 0                       | 7                    |
| 07-094B          | primary prostate cancer | 3                      | 4                        | 0                       | 7                    |
| 07-100A          | primary prostate cancer | 4                      | 3                        | 5                       | 7                    |
| 09-017B          | primary prostate cancer | 4                      | 3                        | 0                       | 7                    |
| 09-049C          | primary prostate cancer | 4                      | 3                        | 0                       | 7                    |
| 09-118D          | primary prostate cancer | 4                      | 3                        | 0                       | 7                    |
| 10-058A          | primary prostate cancer | 4                      | 5                        | 0                       | 9                    |

B) JHU Samples (Figure 1B)

| <b>Subject</b> | <b>Age</b> | <b>Tissue Type</b>      | <b>Gleason Grade</b> |
|----------------|------------|-------------------------|----------------------|
| 1              | 60         | primary prostate cancer | 3+4                  |
| 2              | 68         | primary prostate cancer | 3+4                  |
| 3              | 58         | primary prostate cancer | 3+4                  |
| 4              | 65         | primary prostate cancer | 4+3                  |

**Supplementary Table S2.** Sequence Read Archive Samples and Categorization

Adrenal

Adrenal SRR944040

Adrenal SRR944031

Adrenal SRR944034

Bladder

Bladder epithelium DRR013035

Bladder Epithelium DRR013036

Bladder DRR013040

Bladder DRR013041

Bladder DRR013042

Bladder DRR013043

Bladder DRR013044

Bladder Epithelium DRR013038

Bladder Epithelium DRR013037

Bladder SRR333658

Bladder SRR333660

Bladder SRR333662

Bladder SRR333664

Bladder SRR333666

Bladder SRR333668

Bladder SRR333670

Bladder SRR333672

Bladder SRR333674

Blood

Plasma SRR822438

Blood SRR1949839

Blood SRR1949840

Blood SRR1949841

Blood SRR1949842

Blood SRR1949843

Blood SRR1949844

Blood SRR1949845

Blood SRR1949846

Blood SRR1949847

Blood SRR1949848

Blood SRR1949849

Blood SRR2061740

Blood SRR2061741

Blood SRR2061742

Blood SRR2061743

Blood SRR2061744

Blood SRR2061745  
Blood SRR2061746  
Blood SRR2061747  
Blood SRR2061748  
Blood SRR2061749  
Blood SRR2201546  
Blood SRR2201547  
Blood SRR2201548  
Blood SRR2201549  
Blood SRR2201550  
Blood SRR2201551  
Blood SRR2201572  
Blood SRR2201573  
Blood SRR837471  
Blood SRR837472  
Blood SRR837473  
Blood SRR837474  
Blood SRR837475  
Blood SRR837476  
Blood SRR837477  
PBMC SRR926589  
Plasma Cell SRR060984  
Plasma SRR822437  
Plasma SRR822439  
Plasma SRR822443  
Plasma SRR822444  
Plasma SRR822445  
Plasma SRR822446  
Plasma SRR822450  
Plasma SRR822451  
Platelet ERR747965  
Platelet ERR747966  
Platelet ERR747967  
Platelet SRR1592244  
Platelet SRR1592245  
Platelet SRR1592246  
Platelet SRR1592247  
Platelet SRR1592248  
Platelet SRR1592249  
RBC SRR1664893  
RBC SRR1664894  
RBC SRR1664895  
RBC SRR1664896  
RBC SRR1664897

Brain

Cerebrum SRR1635904  
Prefrontal Cortex SRR1635903  
Brain ERR038405  
Brain ERR038406  
Brain ERR038407  
Brain ERR038408  
Brain ERR038409  
Brain, Frontal SRR448330  
Brain, Frontal SRR448331  
Cerebellum SRR553573  
Frontal cortex SRR553572  
H9\_Diff\_ForeBrain SRR1988291  
H9\_Diff\_ForeBrain SRR1988292  
H9\_Diff\_ForeBrain SRR1988293  
H9\_Diff\_ForeBrain SRR1988294  
H9\_Diff\_MidBrain SRR1988299  
H9\_Diff\_MidBrain SRR1988300  
H9\_Diff\_MidBrain SRR1988301  
H9\_Diff\_MidBrain SRR1988302  
Prefrontal Cortex ERR409878  
Prefrontal Cortex ERR409879  
Prefrontal Cortex ERR409882  
Prefrontal Cortex ERR409883  
Prefrontal Cortex ERR409887  
Prefrontal Cortex ERR409888  
Prefrontal Cortex ERR409891  
Prefrontal Cortex ERR409893  
Prefrontal Cortex ERR409896  
Prefrontal Cortex ERR409898  
Prefrontal Cortex ERR409900  
Prefrontal Cortex SRR1759212  
Prefrontal Cortex SRR1759213  
Prefrontal Cortex SRR1759214  
Prefrontal Cortex SRR1759215  
Prefrontal Cortex SRR1759216  
Prefrontal Cortex SRR1759217  
Prefrontal Cortex SRR1759218  
Prefrontal Cortex SRR1759219  
Prefrontal Cortex SRR1759220

Cervix

Cervix SRR040010  
Cervix SRR040012  
Cervix SRR040014  
Cervix SRR040018  
Cervix SRR040024

Colon

Colon SRR649562  
Colon SRR837819  
Colon SRR837824  
Colon SRR837827  
Colon SRR837830  
Colon SRR837833  
Colon SRR837836  
Colon SRR837839  
Colon SRR837842

Eye

Retina ERR973601  
Retina ERR973602  
Retina ERR973603  
Retina ERR973604  
Retina ERR973605  
Retina ERR973606  
Retina ERR973607  
Retina ERR973608  
Retina ERR973611  
Retina ERR973612  
Retina ERR973613  
Retina ERR973614  
Retina ERR973615  
Retina ERR973616  
Retina ERR973617  
Retina ERR973618

Fat

Fat SRR772343  
Fat SRR772344  
Fat SRR772345  
Fat SRR772353  
Fat SRR772354  
Fat SRR772356  
Fat SRR772359  
Fat SRR772360  
Fat SRR772362  
Fat SRR772363  
Fat SRR772366  
Fat SRR772367  
Fat SRR772368  
Fat SRR772369  
Fat SRR772370

Fibroblast

Fibroblast\_lung SRR1988283  
Fibroblast\_lung SRR1988284  
Fibroblast\_lung SRR1988285  
Fibroblast\_lung SRR1988286

Heart

Heart SRR1635905  
Heart ERR038425  
Heart ERR038426  
Heart ERR038427  
Heart SRR553574

Immune

B cell Centroblast SRR060981  
B Cell Centrocyte SRR060982  
B Cell\_CD77 SRR1209512  
B Cell\_CD77 SRR1209513  
B Cell\_CD77 SRR1209514  
B Cell\_CD77 SRR1209515  
B Cell\_memory SRR060986  
B Cell\_naive SRR060985  
B Cell\_Pre-germinal center SRR060983  
CD14+ monocytes SRR527681  
CD4 T Cell SRR1532971  
CD4 T Cell SRR1532972  
CD4 T Cell SRR1532973  
CD8+ T Cell SRR1853806  
CD8+ T Cell SRR1853807  
CD8+ T Cell SRR1853808  
CD8+ T Cell SRR1853809  
Dendritic SRR1708906  
Dendritic SRR1708907  
Dendritic SRR1708908  
Dendritic SRR1708909  
Dendritic SRR1708910  
Dendritic SRR1708911  
Dendritic SRR1708912  
Dendritic SRR1708913  
Dendritic SRR1708914  
Dendritic SRR1708915  
Dendritic SRR1708916  
Dendritic SRR1708917  
Dendritic SRR1708918  
Dendritic SRR1708919

Dendritic SRR1708920  
Dendritic SRR1708921  
Dendritic SRR1708922  
Dendritic SRR1708923  
Macrophage ERR356515  
Macrophage ERR356519  
Macrophage ERR356520  
Macrophage ERR356521  
Macrophage SRR1532974  
Macrophage SRR1532975

Kidney

Kidney SRR1635906  
Kidney ERR038420  
Kidney ERR038421  
Kidney ERR038422  
Kidney ERR038423  
Kidney ERR038424  
Kidney SRR553575

Liver

Liver SRR950887  
Liver SRR950886  
Liver ERR038410  
Liver ERR038411  
Liver ERR038412  
Liver ERR038413  
Liver ERR038414

Lung

Lung SRR372642  
Lung SRR1635907  
Lung SRR1216774  
Lung SRR1216779  
Lung SRR1216789  
Lung SRR1216801  
Lung SRR1216823  
Lung SRR1216836  
Lung SRR1216838  
Lung SRR1216840  
Lung SRR1608271  
Lung SRR1608272  
Lung SRR1608273  
Lung SRR1608274  
Lung SRR1608275  
Lung SRR1608276



Lung SRR1608277  
Lung SRR1608278  
Lung SRR1608279  
Lung SRR1608280  
Lung SRR1608281  
Lung SRR1608282  
Lung SRR1608283  
Lung SRR1608284  
Lung SRR1608285  
Lung SRR372614  
Lung SRR372616  
Lung SRR372618  
Lung SRR372620  
Lung SRR372624  
Lung SRR372626  
Lung SRR372630  
Lung SRR372632  
Lung SRR372634  
Lung SRR372636  
Lung SRR372638  
Lung SRR372640  
Lung SRR372642  
Lung SRR372644  
Lung SRR372646  
Lung SRR372648  
Lung SRR372650

Pancreas

Pancreas ERR852089  
Pancreas ERR852091  
Pancreas ERR852092  
Pancreas ERR852097  
Pancreas ERR852099

Placenta

Placenta SRR567635  
Placenta SRR567636  
Placenta SRR567637  
Placenta SRR567638  
Placenta SRR567642  
Placenta SRR567643  
Placenta SRR567644  
Placenta SRR567645  
Placenta SRR822452  
Placenta SRR822453  
Placenta SRR822454

Placenta SRR822455  
Placenta SRR822456  
Placenta SRR822457  
Placenta SRR822458  
Placenta SRR822459

Prostate

Prostate\_SRR1051368  
Prostate\_SRR1051375  
Prostate\_SRR1051385  
Prostate\_SRR1051377  
Prostate\_SRR1051376

Skeletal Muscle

Skeletal muscle SRR1820680  
Skeletal Muscle SRR1635908

Skin

Epidermis SRR1259212  
Dermis SRR1259216  
Dermis SRR1259218  
Dermis SRR1259220  
Dermis SRR1259222  
Dermis SRR1259224  
Epididymis SRR384894  
Skin SRR1259226  
Skin SRR1259228  
Skin SRR1259230  
Skin SRR1259236  
Skin SRR2174541  
Skin SRR2174542  
Skin\_SRR2174509  
Skin\_SRR2174513  
Skin\_SRR2174517  
Skin\_SRR2174521  
Skin\_SRR2174525  
Skin\_SRR2174529  
Skin\_SRR2174533

Testes

Testes ERR038415  
Testes ERR038416  
Testes ERR038417  
Testes ERR038419  
Testes SRR333676  
Testes SRR333678

Testes SRR333680  
Testes SRR333682  
Testes SRR333684  
Testes SRR333686  
Testes SRR333688  
Testes SRR553576

Thyroid

Thyroid SRR1291267  
Thyroid SRR1291268  
Thyroid SRR1291269  
Thyroid SRR1658401  
Thyroid SRR1658402  
Thyroid SRR1658403  
Thyroid SRR1658404  
Thyroid SRR1658405  
Thyroid SRR1658406  
Thyroid SRR1658407  
Thyroid SRR1658408

Uterus

Uterus SRR1556139  
Uterus SRR1556141  
Uterus SRR1556143

## Supplementary Fig.S1

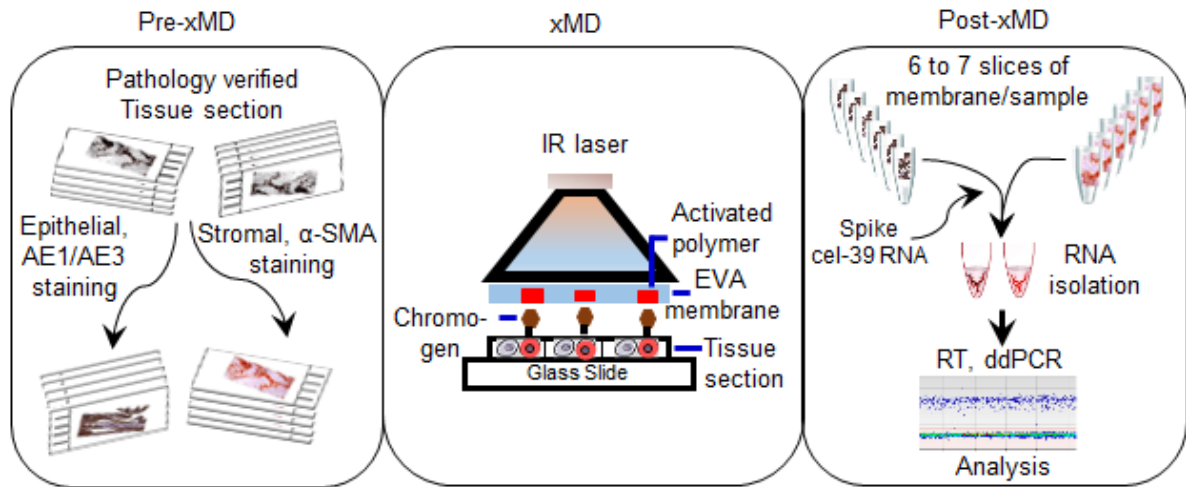

**Supplementary Figure S1.** Schematic of xMD isolation of prostate stroma and epithelium.

FFPE slides (n=6-7 per sample) were either scraped for macrodissection analyses or IHC stained for stroma (anti- $\alpha$ -SMA) or epithelium (anti-AE1/AE3). The region of interest was overlaid with EVA membrane, sealed, and exposed 5 times at power 5 to a flash lamp. The membrane was removed, further dissected by light microscopy and stored at  $-80^{\circ}\text{C}$ . The resulting membranes were combined for each sample and total RNA extracted. Internal control cel-39 was added and Total RNA extracted. MicroRNAs were quantified by RT-ddPCR.

## Supplementary Figure S2.

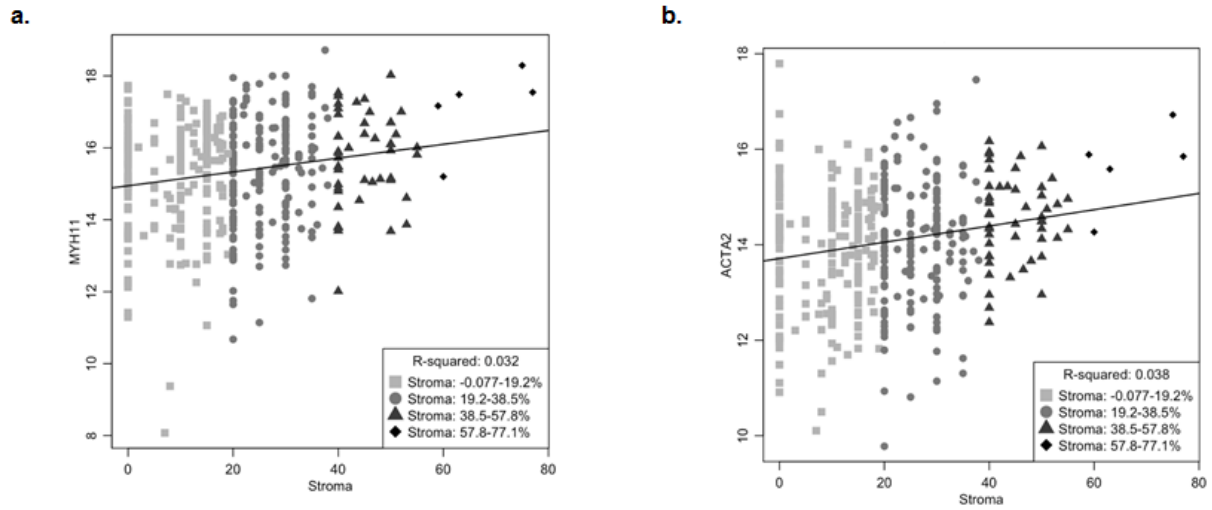

**Supplementary Figure S2.** Correlation of TCGA-reported stromal cell content and stromal-specific marker expression. **a**, Weak positive association of Smooth Muscle Myosin Heavy Chain 11 (MYH11) mRNA level and reported stromal percentages. p-value:  $1.7 \times 10^{-4}$ . **b**, Weak positive association of Smooth Muscle Actin (ACTA2) mRNA level and reported stromal percentages. p-value:  $4.8 \times 10^{-5}$ . Pearson's correlation coefficient determined by linear regression analysis and fitted using least-squares method.

**Supplementary Figure S3**

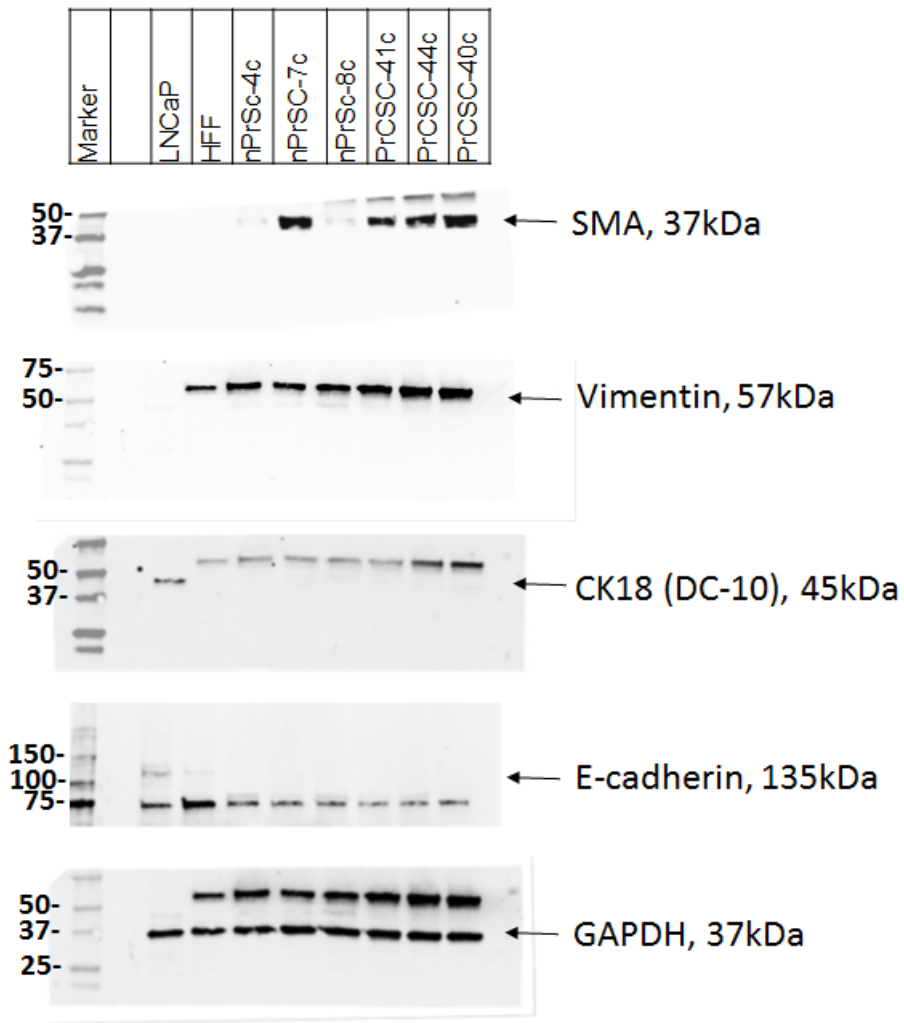

**Supplementary Figure S3.** Full unedited gels applied to Figure 5B.
